# Supplementary material for: A highly efficient and durable water splitting system: platinum sub-nanocluster functionalized nickel–iron layered double hydroxide as the cathode and hierarchical nickel–iron selenide as the anode
Source: Royal Society of Chemistry journal article supplement (doi:10.1039/c8ta10789k), 2019-01-01
Supplement: c8ta10789k1.pdf [file c8ta10789k1.pdf]

## *Supporting Information*

**A Highly Efficient and Durable Water Splitting System: Platinum Sub-Nanoclusters  
Functionalized Nickel Iron Layered Double Hydroxide as the Cathode and Hierarchical  
Nickel Iron Selenide as the Anode**

*Qing Yan<sup>1</sup>, Peng Yan<sup>1</sup>, Tong Wei<sup>1</sup>, Guiling Wang<sup>1</sup>\*, Kui Cheng<sup>1</sup>, Ke Ye<sup>1</sup>, Kai Zhu<sup>1</sup>, Jun Yan<sup>1</sup>,  
Dianxue Cao<sup>1</sup>, Yiju Li<sup>1</sup> \**

*<sup>1</sup>Key Laboratory of Superlight Materials and Surface Technology of Ministry of Education, College  
of Materials Science and Chemical Engineering, Harbin Engineering University, Harbin 150001,  
P. R. China*

\* Corresponding Authors: [wangguiling@hrbeu.edu.cn](mailto:wangguiling@hrbeu.edu.cn) (Guiling Wang)

[liyijuliyiju2014@outlook.com](mailto:liyijuliyiju2014@outlook.com) (Yiju Li)

## Experimental Section

*Chemicals and Materials:* Chloroplatinic acid hexahydrate ( $\text{H}_2\text{PtCl}_6 \cdot 6\text{H}_2\text{O}$ ), sodium borohydride ( $\text{NaBH}_4$ ) and selenium (Se) were served by Sinopharm Chemical Reagent co., Ltd. (Shanghai, China), iron (II) sulfate heptahydrate ( $\text{FeSO}_4 \cdot 7\text{H}_2\text{O}$ ) and urea ( $\text{CO}(\text{NH}_2)_2$ ) were purchased from Tianli Chemical Reagent Co., Ltd. (Tianjin, China). Nickel nitrate hexahydrate ( $\text{Ni}(\text{NO}_3)_2 \cdot 6\text{H}_2\text{O}$ ) and ammonium fluoride ( $\text{NH}_4\text{F}$ ) were obtained from Fuchen Chemical Reagent Factory (Tianjin, China). All the chemicals were of analytical grade and used without further purification. All the solutions were prepared with Milli-Q water ( $18.2 \text{ M}\Omega \cdot \text{cm}$ ). The hydrophilic carbon cloth (Type: HCP330N, Thickness:  $0.32 \pm 0.02 \text{ mm}$ ) was bought from Shanghai hesen electric co. Ltd. The commercial Pt/C (Type: HPT020, Platinum content: 19.30-20.70%) was bought from Shanghai hesen electric co. LTD. The commercial  $\text{RuO}_2$  (Type: K901828, Ruthenium content:  $\text{Ru} \geq 75.2\%$ ) was bought from Shanghai dibai biotechnology co. LTD.

*Synthesis of NiFe LDH/CC:*  $\text{Ni}(\text{NO}_3)_2 \cdot 6\text{H}_2\text{O}$  (2.0 mmol),  $\text{FeSO}_4 \cdot 7\text{H}_2\text{O}$  (0.5 mmol),  $\text{NH}_4\text{F}$  (10 mmol) and urea (25 mmol) were dissolved in 40 mL deionized  $\text{H}_2\text{O}$ . Then, one piece of carbon fiber cloth ( $24 \text{ mm} \times 36 \text{ mm}$ ) ( $13.5 \text{ mg cm}^{-2}$ ) was put into the above solution. The mixture was sealed in a 45 ml Teflon-lined stainless-steel autoclave and heated under  $120 \text{ }^\circ\text{C}$  for 16 h. After that, the obtained product was washed with distilled water and ethanol.

*Synthesis of Pt-NiFe LDH/CC Electrode:* The Pt-NiFe LDH/CC electrode was synthesized via a simple wet chemical reduction method. Typically, one piece of the NiFe LDH/CC was immersed into 50 mL  $\text{H}_2\text{O}$ . Subsequently, 0.65 mL  $\text{H}_2\text{PtCl}_6 \cdot 6\text{H}_2\text{O}$  (20 mM) was added, and the mixture was heated under  $90 \text{ }^\circ\text{C}$  with continuous stirring for 30 min. After cooling to room temperature, the product was washed with deionized water several times. The mass loadings of Pt-NiFe LDH and Pt on carbon fiber cloth are  $3.50$  and  $0.266 \text{ mg cm}^{-2}$ , respectively (Pure carbon fiber cloth:  $13.5 \text{ mg cm}^{-2}$ ). For comparison, the Pt/CC was prepared by replacing the FeNi LDH/CC with a piece of pure carbon fiber cloth.

*Synthesis of (Ni<sub>0.77</sub>Fe<sub>0.23</sub>)Se<sub>2</sub>/CC Electrode:* Se (2 mmol) and NaBH<sub>4</sub> (4 mmol) were dissolved in 2 mL H<sub>2</sub>O. Next, the mixture was diluted into 38 mL H<sub>2</sub>O, and a piece of the FeNi LDH/CC was immersed into above solution. The mixture was then transferred into a 45-mL Teflon-lined stainless-steel autoclave and heated under 160 °C for 6 h. The obtained product was washed with deionized water several times.

*Synthesis of Com-Pt/C and Com-RuO<sub>2</sub> Electrodes:* Typically, the mixture containing 10 mg commercial 20 wt% Pt/C catalysts, 0.5 mL H<sub>2</sub>O, 0.5 mL ethanol, and 0.032 mL 5% Nafion were mixed to form catalyst slurry. The Com-Pt/C electrode was fabricated by casting the slurry onto one piece of carbon fiber cloth (10 mm × 10 mm). The mass loading of active material (20 wt% Pt/C) was controlled to be 3.50 mg cm<sup>-2</sup> (same as the Pt-NiFe LDH/CC electrode). The Com-RuO<sub>2</sub> electrode was prepared by just replacing the commercial 20 wt% Pt/C catalyst with the commercial RuO<sub>2</sub> catalyst.

*Characterizations:* The morphologies of all the samples were examined by SEM (JEOL JSM-6480) and TEM (FEI Teccai G2 S-Twin, Philips). The phase compositions were characterized by XRD (Rigaku TTR III) using Cu K $\alpha$  radiation ( $\lambda = 0.17889$  nm) in a  $2\theta$  range of 20°-80°. The surface chemical states of samples were investigated by XPS using Al K $\alpha$  radiation (Thermo ESCALAB 250). The element contents of samples were measured using ICP-MS (Thermo X Series II) and EDS.

*Electrochemical Measurements:* The electrochemical performance in a standard three-electrode system was tested with cyclic voltammetry (CV), linear sweep voltammetry (LSV) and chronopotentiometry (CP) controlled by a computerized potentiostat (Autolab PGSTAT 302, Eco Chemie company in Holland). The catalysts of Pt-NiFe LDH/CC, (Ni<sub>0.77</sub>Fe<sub>0.23</sub>)Se<sub>2</sub>/CC, Com-Pt/C, Com-RuO<sub>2</sub>, NiFe LDH/CC, Pt/CC or CC were served as the working electrode, a Ag/AgCl (saturated KCl) electrode was served as the reference electrode, and a carbon rod was served as the counter electrode. All tests were carried out in a 1.0 M KOH solution. EIS measurements were

accomplished in the frequency range of  $10^5$  Hz to 0.01 Hz. For overall water splitting, a two-electrode electrolyzer was constructed using the Pt-NiFe LDH/CC electrode as cathode and the  $(\text{Ni}_{0.77}\text{Fe}_{0.23})\text{Se}_2/\text{CC}$  electrode as anode. Overall water splitting performance was evaluated using the LSV and CP in a 1.0 M KOH. All measured LSV and CP curves were IR-corrected. All potentials vs. RHE are obtained by converting the measured potentials vs. Ag/AgCl according to the following equation:  $E_{(\text{RHE})} = E_{(\text{Ag}/\text{AgCl})} + 0.197 + 0.0592 \cdot \text{pH}$ .

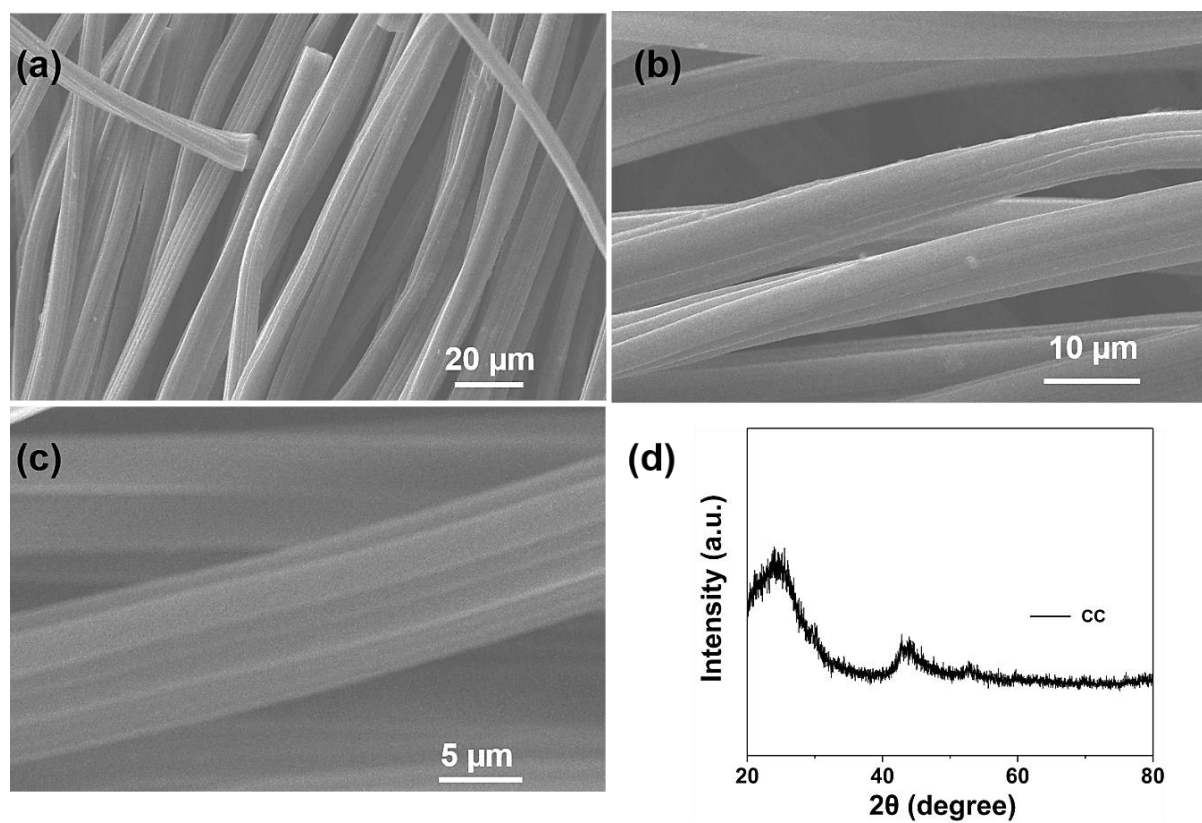

**Figure S1.** SEM images at different magnifications (a-c) and XRD pattern (d) of CC.

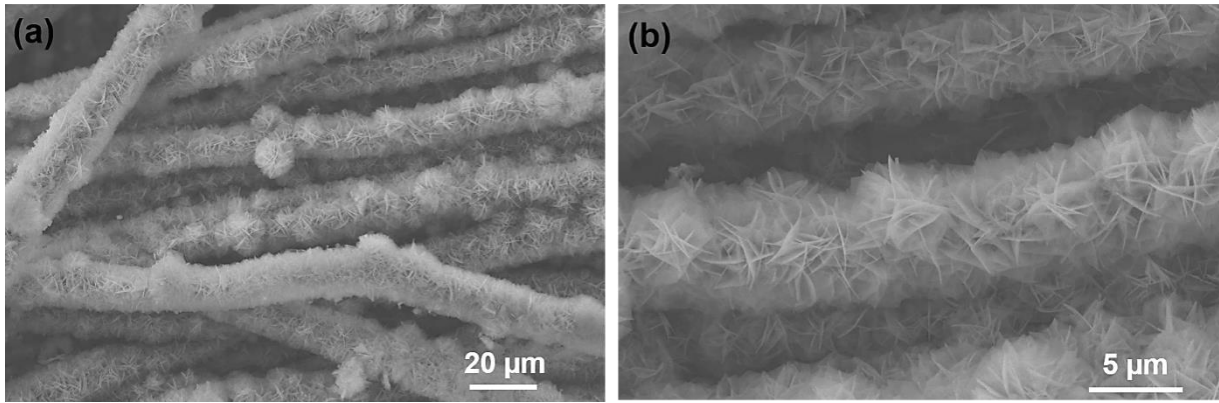

**Figure S2.** SEM images of the NiFe LDH/CC at low (a) and high (b) magnifications.

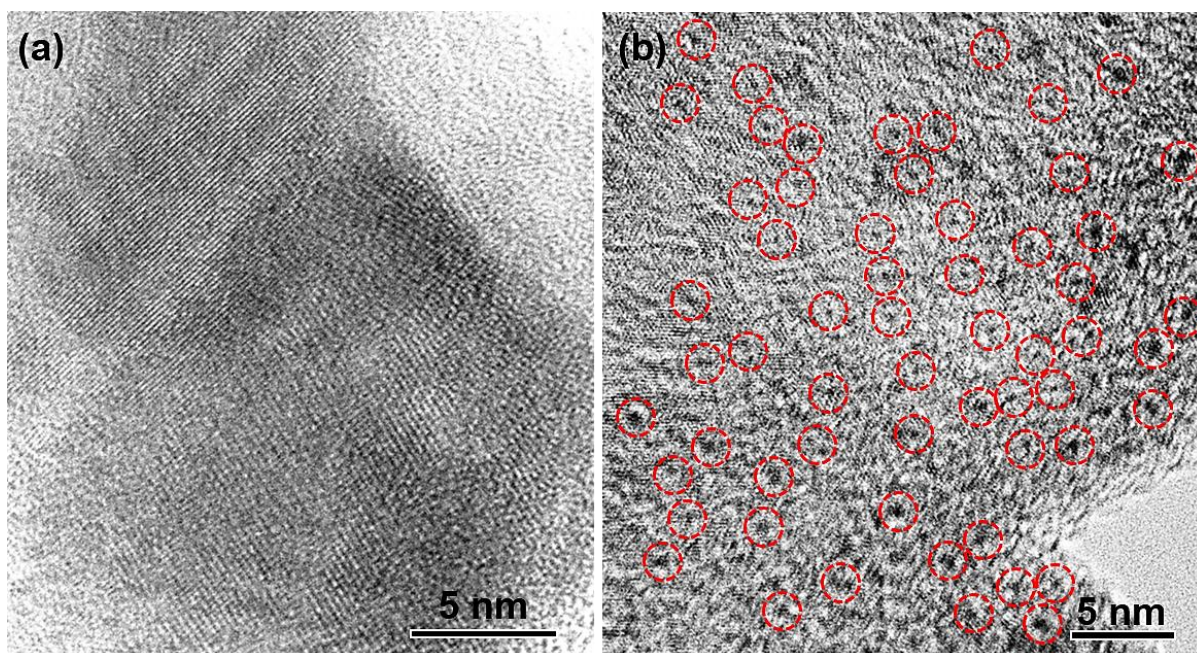

**Figure S3.** HRTEM images of the NiFe LDH (a) and Pt-NiFe LDH nanosheets (b).

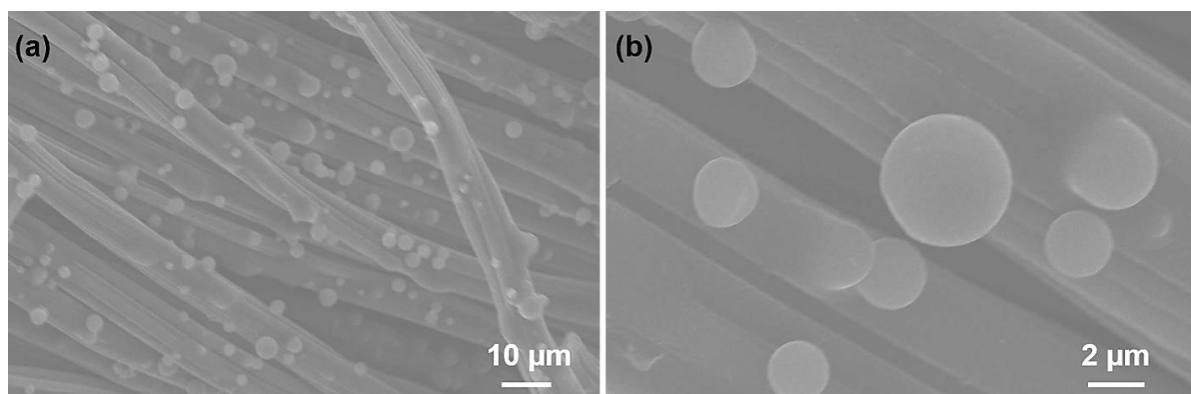

**Figure S4.** SEM images of the Pt/CC electrode at different magnifications.

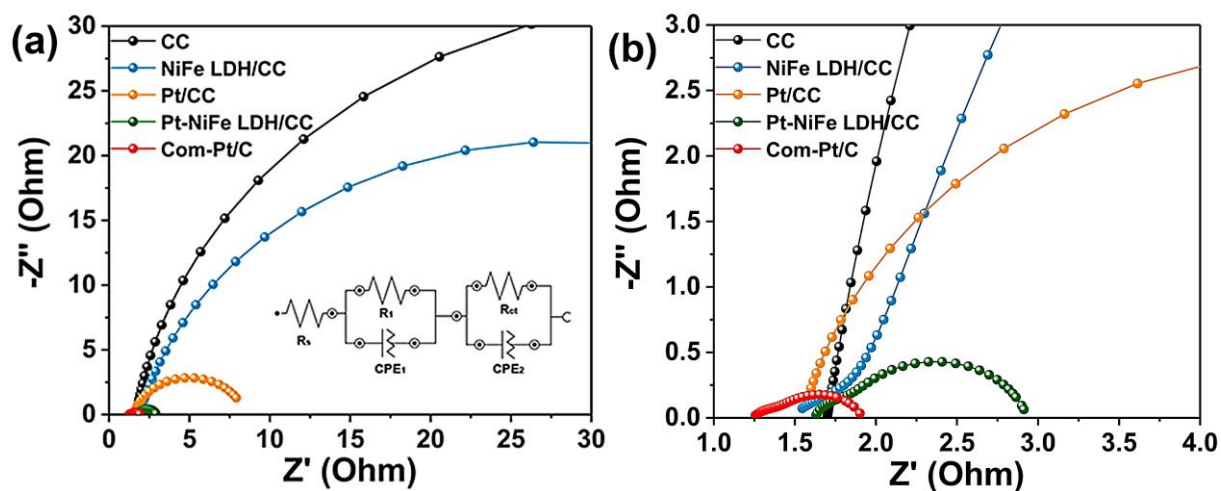

**Figure S5.** Nyquist plots of different HER catalysts measured at an overpotential of 200 mV in the frequency range of  $10^5$ -0.01 Hz. Inset in Figure S5a showing the modified Randle equivalent circuit model.

**Table S1.** Summary of  $R_s$  and  $R_{ct}$  for different HER catalysts by fitting the Nyquist plots using the equivalent circuit model.

|                | $R_s$ (Ohm) | $R_{ct}$ (Ohm) |
|----------------|-------------|----------------|
| Pt-NiFe LDH/CC | 1.62        | 1.1            |
| Com-Pt/C       | 1.24        | 0.49           |
| Pt/CC          | 1.55        | 6.91           |
| NiFe LDH/CC    | 1.47        | 36.5           |
| CC             | 1.75        | 52.4           |



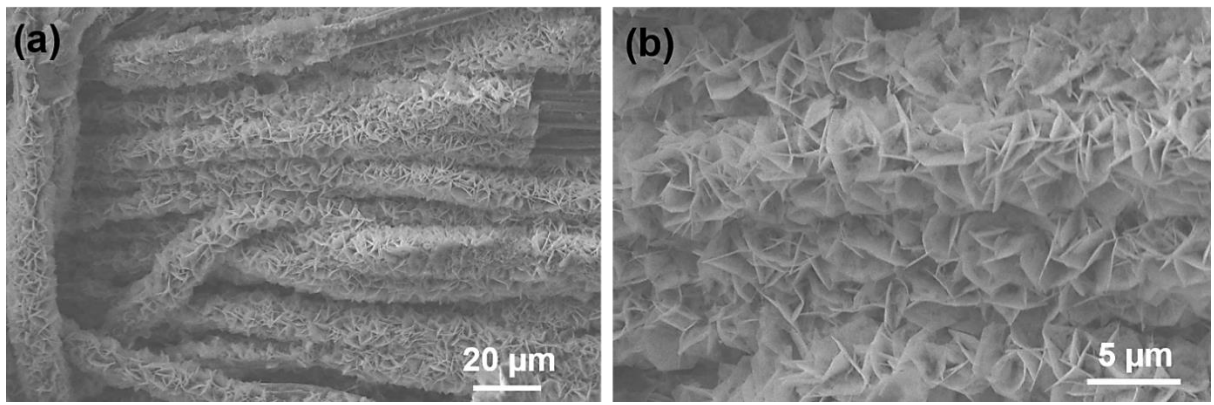

**Figure S6.** SEM images of the Pt-NiFe LDH/CC electrode at different magnifications after HER stability test.

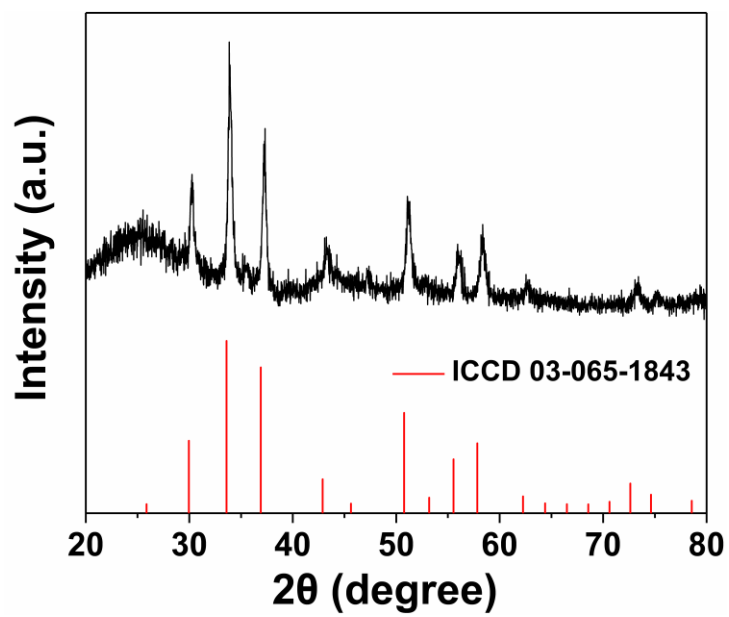

**Figure S7.** XRD pattern of the  $(\text{Ni}_{0.77}\text{Fe}_{0.23})\text{Se}_2/\text{CC}$  composite electrode.

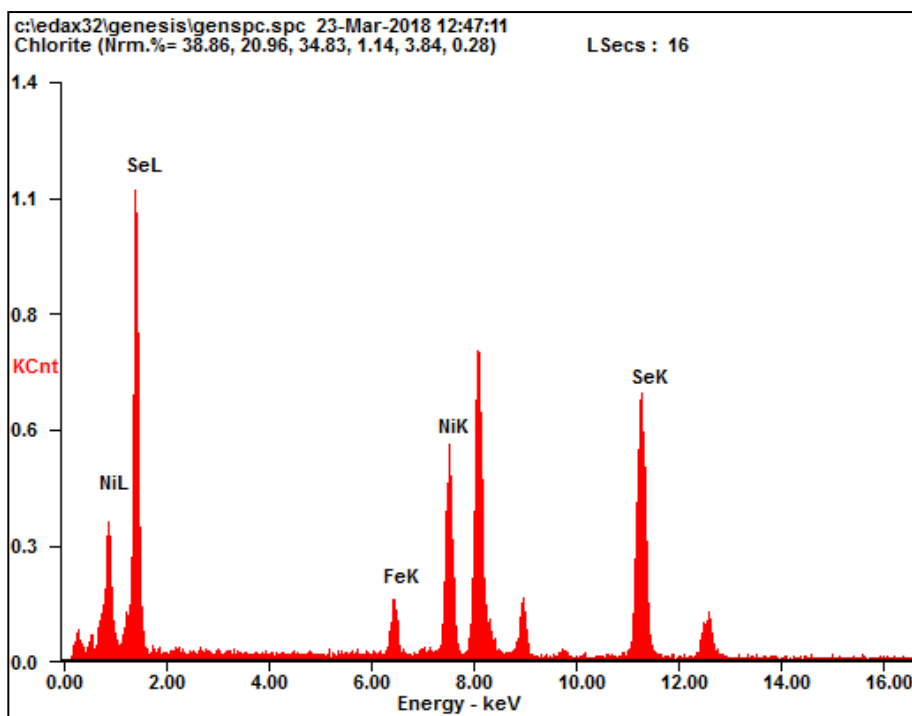

**Figure S8.** EDS plot of the  $(\text{Ni}_{0.77}\text{Fe}_{0.23})\text{Se}_2/\text{CC}$ .

**Table S2.** Elemental summary of the  $(\text{Ni}_{0.77}\text{Fe}_{0.23})\text{Se}_2/\text{CC}$ .

|           | Atomic % |
|-----------|----------|
| <b>Fe</b> | 8.31     |
| <b>Ni</b> | 27.79    |
| <b>Se</b> | 63.90    |

**Table S3.** Atomic ratio of Ni/Fe in the  $(\text{Ni}_{0.77}\text{Fe}_{0.23})\text{Se}_2/\text{CC}$  sample determined by ICP-MS.

|           | Atomic % |
|-----------|----------|
| <b>Fe</b> | 21.68    |
| <b>Ni</b> | 78.32    |

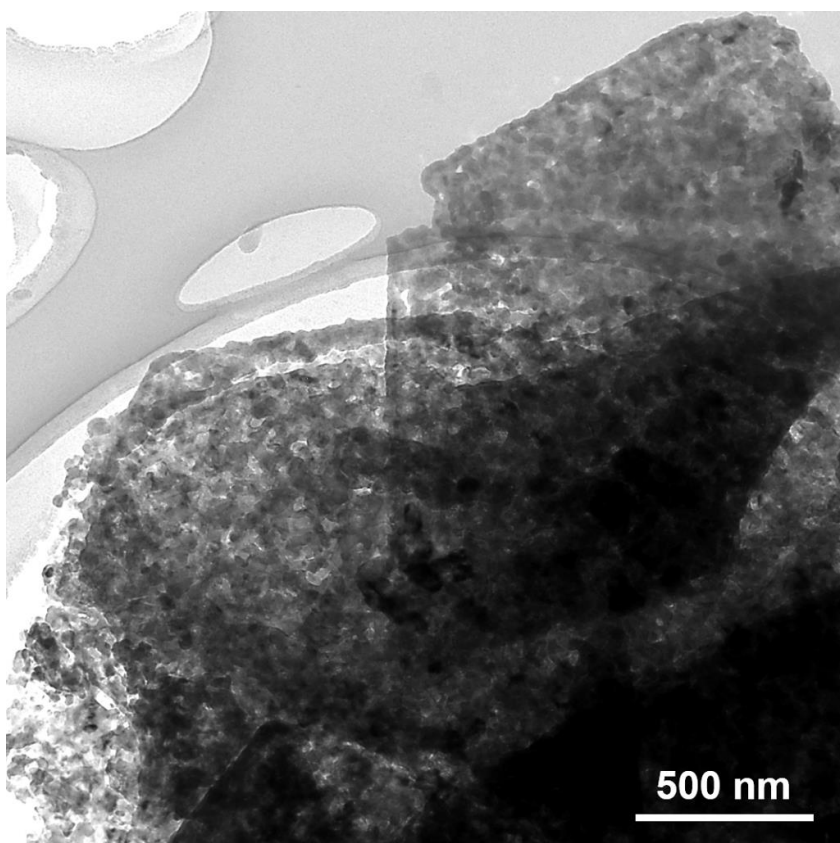

**Figure S9.** TEM image of the  $(\text{Ni}_{0.77}\text{Fe}_{0.23})\text{Se}_2$  nanosheets.

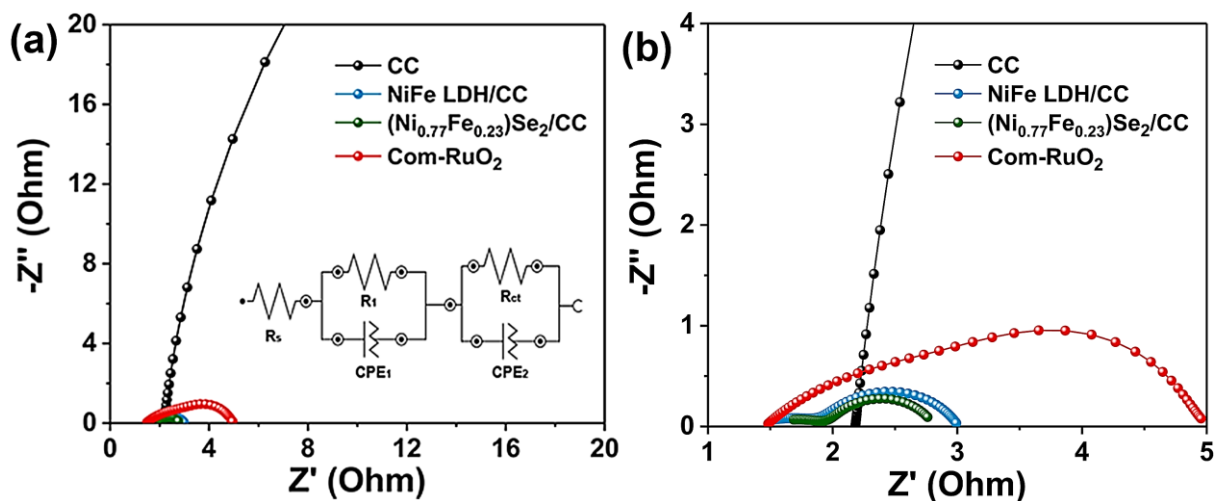

**Figure S10.** Nyquist plots of different OER catalysts measured at an overpotential of 300 mV in the frequency range of  $10^5$ -0.01 Hz. Inset in Figure S10a showing the modified Randle equivalent circuit model.

**Table S4.** Summary of  $R_s$  and  $R_{ct}$  for different OER catalysts by fitting the Nyquist plots using the equivalent circuit model.

|                                                           | $R_s$ (Ohm) | $R_{ct}$ (Ohm) |
|-----------------------------------------------------------|-------------|----------------|
| $(\text{Ni}_{0.77}\text{Fe}_{0.23})\text{Se}_2/\text{CC}$ | 1.41        | 0.788          |
| Com-RuO <sub>2</sub>                                      | 1.46        | 1.07           |
| NiFe LDH/CC                                               | 1.34        | 1.02           |
| CC                                                        | 2.18        | 138            |

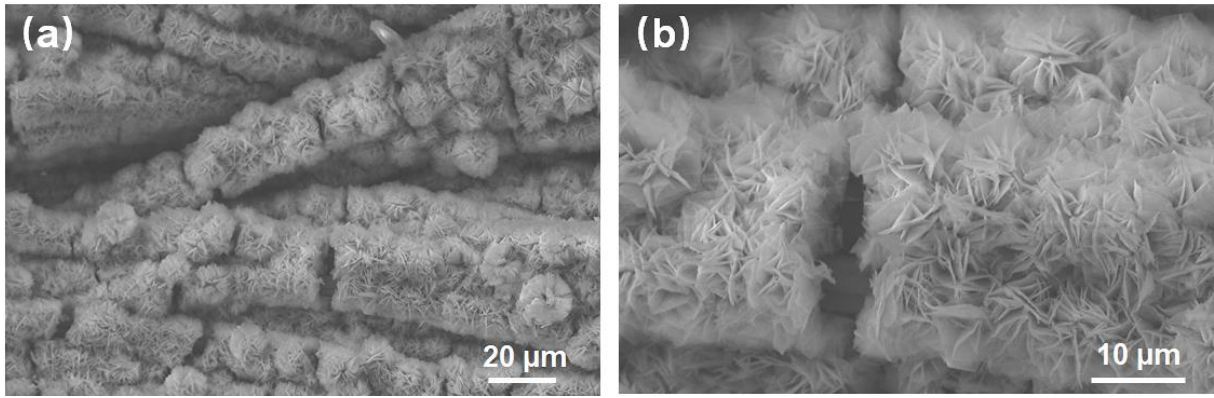

**Figure S11.** SEM images of the  $(\text{Ni}_{0.77}\text{Fe}_{0.23})\text{Se}_2/\text{CC}$  at different magnifications after OER stability test.

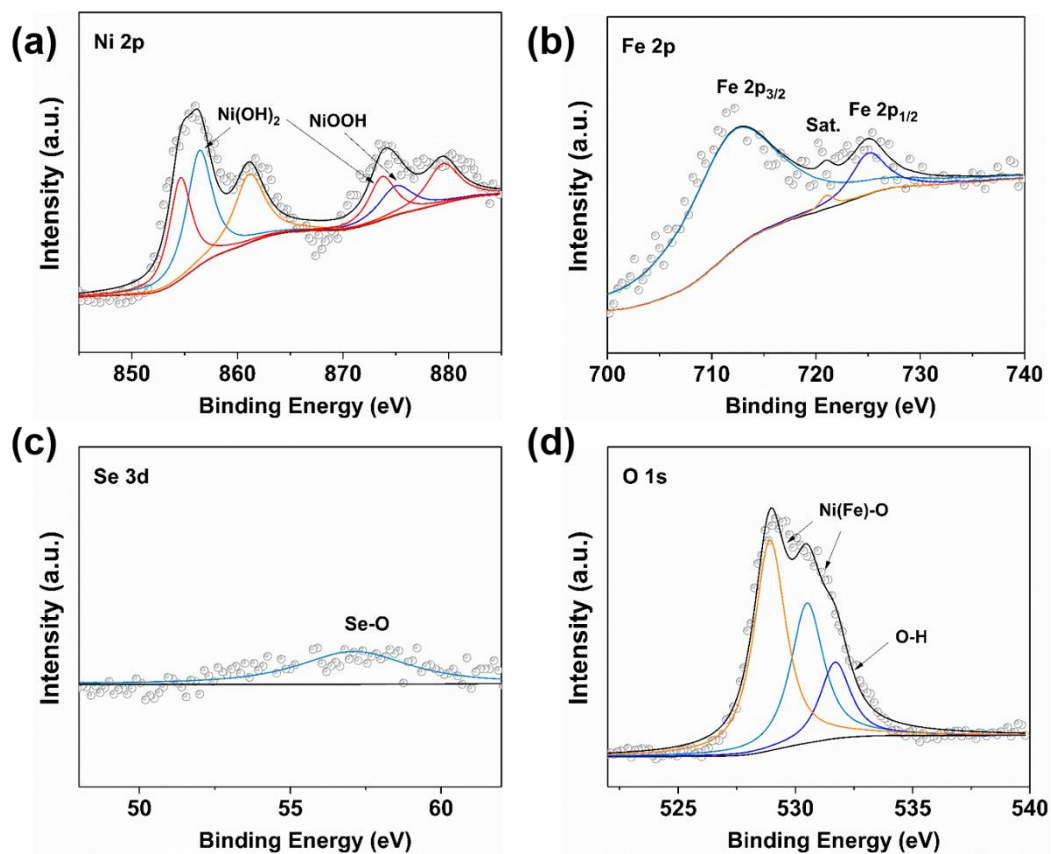

**Figure S12.** (a) Ni 2p, (b) Fe 2p, (c) Se 3d and (d) O 1s XPS spectra of the  $(\text{Ni}_{0.77}\text{Fe}_{0.23})\text{Se}_2/\text{CC}$  after OER stability test.

**Table S5.** Performance comparison of our Pt-NiFe LDH/CC || (Ni<sub>0.77</sub>Fe<sub>0.23</sub>)Se<sub>2</sub>/CC water electrolyzer with other water splitting systems.

| Water splitting system (HER catalyst    OER catalyst)                                                                                       | Support | Electrolyte  | Voltage (V)@<br>10 mA cm <sup>-2</sup> | Reference |
|---------------------------------------------------------------------------------------------------------------------------------------------|---------|--------------|----------------------------------------|-----------|
| CoP NS-2    Co <sub>3</sub> O <sub>4</sub> NS-2                                                                                             | NF      | 1 M KOH      | 1.63                                   | 1         |
| NiFe LDHs/NF    NiFe LDHs/NF                                                                                                                | NF      | 1 M KOH      | 1.7                                    | 2         |
| NiFe <sub>2</sub> O <sub>4</sub> /NiFe LDH   <br>NiFe <sub>2</sub> O <sub>4</sub> /NiFe LDH                                                 | NF      | 1 M KOH      | 1.535                                  | 3         |
| PA-NiO    PA-NiO                                                                                                                            | NF      | 1 M KOH      | 1.56                                   | 4         |
| NiCo <sub>2</sub> S <sub>4</sub> @NiFe LDH/<br>NF    NiCo <sub>2</sub> S <sub>4</sub> @NiFe LDH/<br>NF                                      | NF      | 1 M KOH      | 1.6                                    | 5         |
| Ni <sub>0.75</sub> Fe <sub>0.125</sub> V <sub>0.125</sub> -LDHs/NF   <br>Ni <sub>0.75</sub> Fe <sub>0.125</sub> V <sub>0.125</sub> -LDHs/NF | NF      | 1 M KOH      | 1.591                                  | 6         |
| (Ni,Co)Se <sub>2</sub> -GA    (Ni,Co)Se <sub>2</sub> -GA                                                                                    | NF      | 1 M KOH      | 1.60                                   | 7         |
| Co <sub>5</sub> Mo <sub>1.0</sub> P NSs@NF    Co <sub>5</sub> Mo <sub>1.0</sub> O<br>NSs@NF                                                 | NF      | 1 M KOH      | 1.68                                   | 8         |
| Ni <sub>3</sub> S <sub>2</sub> -300    Ni <sub>3</sub> S <sub>2</sub> -300                                                                  | NF      | 1 M NaOH     | 1.611                                  | 9         |
| VOOH nanospheres  VOOH<br>nanospheres                                                                                                       | NF      | 1 M KOH      | 1.62                                   | 10        |
| Co <sub>1</sub> Mn <sub>1</sub> CH/NF    Co <sub>1</sub> Mn <sub>1</sub> CH/NF                                                              | NF      | 1 M KOH      | 1.68                                   | 11        |
| Mo <sub>2</sub> C@C    Mo <sub>2</sub> C@C                                                                                                  | NF      | 1 M KOH      | 1.73                                   | 12        |
| NiFe-MOF/NF    NiFe-MOF/NF                                                                                                                  | NF      | 0.1 M<br>KOH | 1.55                                   | 13        |
| Ni@NC-800/NF    Ni@NC-800/NF                                                                                                                | NF      | 1 M KOH      | 1.6                                    | 14        |
| Fe-H <sub>2</sub> cat    Fe-O <sub>2</sub> cat                                                                                              | IF      | 1 M KOH      | 1.65                                   | 15        |
| Co <sub>3</sub> Se <sub>4</sub> /CF    Co <sub>3</sub> Se <sub>4</sub> /CF                                                                  | CF      | 1 M KOH      | 1.59                                   | 16        |
| EG/Co <sub>0.85</sub> Se/NiFe-LDH   <br>EG/Co <sub>0.85</sub> Se/NiFe-LDH                                                                   | GF      | 1 M KOH      | 1.67                                   | 17        |
| Cu@NiFe LDH    Cu@NiFe LDH                                                                                                                  | CuF     | 1 M KOH      | 1.54                                   | 18        |



|                                                                                    |           |                |             |                  |
|------------------------------------------------------------------------------------|-----------|----------------|-------------|------------------|
| CoP/NCNHP    CoP/NCNHP                                                             | CP        | 1 M KOH        | 1.64        | 19               |
| Co <sub>2</sub> P/CNT    Co <sub>2</sub> P/CNT                                     | CP        | 1 M KOH        | 1.53        | 20               |
| Pt-CoS <sub>2</sub> /CC    Pt-CoS <sub>2</sub> /CC                                 | CC        | 1 M KOH        | 1.55        | 21               |
| NiCoSe <sub>2</sub>    NiCoSe <sub>2</sub>                                         | CC        | 1 M KOH        | 1.62        | 22               |
| <b>Pt-NiFe LDH/CC   <br/>(Ni<sub>0.77</sub>Fe<sub>0.23</sub>)Se<sub>2</sub>/CC</b> | <b>CC</b> | <b>1 M KOH</b> | <b>1.52</b> | <b>This work</b> |

Notes: NF-Nickel foam; IF-Iron foam; CF-Cobalt foam; GF-Graphite foil; CuF-Cu foam; CP-Carbon paper; CC-Carbon fiber cloth.

## Referenes

1. H. Wu, Z. Chen, J. Zhang, F. Wu, F. Xiao, S. Du, C. He, Y. Wu and Z. Ren, *Small*, 2018, **14**, 1702896.
2. J. Luo, J. H. Im, M. T. Mayer, M. Schreier, M. K. Nazeeruddin, N. G. Park, S. D. Tilley, H. J. Fan and M. Gratzel, *Science*, 2014, **345**, 1593-1596.
3. Z. Wu, Z. Zou, J. Huang and F. Gao, *ACS Appl. Mater. Interfaces*, 2018, **10**, 26283-26292.
4. Z. Li, W. Niu, L. Zhou and Y. Yang, *ACS Energy Lett.*, 2018, **3**, 892-898.
5. J. Liu, J. Wang, B. Zhang, Y. Ruan, L. Lv, X. Ji, K. Xu, L. Miao and J. Jiang, *ACS Appl. Mater. Interfaces*, 2017, **9**, 15364-15372.
6. K. N. Dinh, P. Zheng, Z. Dai, Y. Zhang, R. Dangol, Y. Zheng, B. Li, Y. Zong and Q. Yan, *Small*, 2017, **14**, 1703257.
7. X. Xu, H. Liang, F. Ming, Z. Qi, Y. Xie and Z. Wang, *ACS Catal.*, 2017, **7**, 6394-6399.
8. Y. Zhang, Q. Shao, S. Long and X. Huang, *Nano Energy*, 2018, **45**, 448-455.
9. J. Dong, F.-Q. Zhang, Y. Yang, Y.-B. Zhang, H. He, X. Huang, X. Fan and X.-M. Zhang, *Appl. Catal., B*, 2019, **243**, 693-702.
10. H. Shi, H. Liang, F. Ming and Z. Wang, *Angew. Chem. Int. Ed.*, 2017, **56**, 573-577.
11. T. Tang, W. J. Jiang, S. Niu, N. Liu, H. Luo, Y. Y. Chen, S. F. Jin, F. Gao, L. J. Wan and J. S. Hu, *J. Am. Chem. Soc.*, 2017, **139**, 8320-8328.
12. H. Wang, Y. Cao, C. Sun, G. Zou, J. Huang, X. Kuai, J. Zhao and L. Gao, *ChemSusChem*, 2017, **10**, 3540-3546.
13. J. Duan, S. Chen and C. Zhao, *Nat. Commun.*, 2017, **8**, 15341.

14. Y. Xu, W. Tu, B. Zhang, S. Yin, Y. Huang, M. Kraft and R. Xu, *Adv. Mater.*, 2017, **29**, 1605957.
15. X. Zou, Y. Wu, Y. Liu, D. Liu, W. Li, L. Gu, H. Liu, P. Wang, L. Sun and Y. Zhang, *Chem*, 2018, DOI: 10.1016/j.chempr.2018.02.023.
16. W. Li, X. Gao, D. Xiong, F. Wei, W.-G. Song, J. Xu and L. Liu, *Adv. Energy Mater.*, 2017, **7**, 1602579.
17. Y. Hou, M. R. Lohe, J. Zhang, S. Liu, X. Zhuang and X. Feng, *Energy Environ. Sci.*, 2016, **9**, 478-483.
18. L. Yu, H. Zhou, J. Sun, F. Qin, F. Yu, J. Bao, Y. Yu, S. Chen and Z. Ren, *Energy Environ. Sci.*, 2017, **10**, 1820-1827.
19. Y. Pan, K. Sun, S. Liu, X. Cao, K. Wu, W. C. Cheong, Z. Chen, Y. Wang, Y. Li, Y. Liu, D. Wang, Q. Peng, C. Chen and Y. Li, *J. Am. Chem. Soc.*, 2018, **140**, 2610-2618.
20. D. Das and K. K. Nanda, *Nano Energy*, 2016, **30**, 303-311.
21. X. Han, X. Wu, Y. Deng, J. Liu, J. Lu, C. Zhong and W. Hu, *Adv. Energy Mater.*, 2018, **8**, 1800935.
22. J. Yu, Y. M. Tian, F. Zhou, M. L. Zhang, R. R. Chen, Q. Liu, J. Y. Liu, C. Y. Xu and J. Wang, *J. Mater. Chem. A*, 2018, **6**, 17353-17360
